# Supplementary material
Source: PubMed Central journal article supplement (PMC7284089)
Supplement: advancesADV2020001485-suppl1.pdf [file advancesADV2020001485-suppl1.pdf]

**Table S1. Antibodies used in Luminex assays**

| <b>Protein</b> | <b>Capture Antibody</b> | <b>Detection Antibody</b> | <b>Detection limit, pg/mL</b> |
|----------------|-------------------------|---------------------------|-------------------------------|
| CCL14          | R&D Systems # MAB3241   | R&D Systems # BAF324      | 10                            |
| DKK3           | R&D Systems # DY1118    | R&D Systems # DY1118      | 10                            |
| IL1RAP         | R&D Systems # DY676     | R&D Systems # DY676       | 40                            |
| IL6ST          | R&D Systems # MAB628    | R&D Systems # BAF228      | 10                            |
| LGALS3BP       | R&D Systems # DY2226    | R&D Systems # DY2226      | 40                            |

**Table S2. Proteins associated with sclerotic GVHD**

| Gene name | Gene description                                         | Mean fold difference in sclerotic GVHD compared with each group* |              |               |      |                      |              |               |      |
|-----------|----------------------------------------------------------|------------------------------------------------------------------|--------------|---------------|------|----------------------|--------------|---------------|------|
|           |                                                          | Experiment in male                                               |              |               |      | Experiment in female |              |               |      |
|           |                                                          | No GVHD                                                          | cGVHD /w IST | cGVHD /wo IST | BOS  | No GVHD              | cGVHD /w IST | cGVHD /wo IST | BOS  |
| ACP1      | Low molecular weight phosphotyrosine protein phosphatase | 0.79                                                             | 0.44         | 0.48          | 0.35 | 0.55                 | 0.28         | 0.25          | 0.33 |
| ADAMTSL4  | ADAMTS-like protein 4                                    | 2.02                                                             | 4.95         | 3.37          | 3.11 | 3.33                 | 3.66         | 2.73          | 2.11 |
| AGT       | Angiotensinogen                                          | 0.70                                                             | 0.49         | 0.64          | 0.46 | 0.61                 | 0.50         | 0.47          | 0.59 |
| ALDOB     | Fructose-bisphosphate aldolase B                         | 0.69                                                             | 0.42         | 0.58          | 0.45 | 0.56                 | 0.38         | 0.31          | 0.37 |
| ANG       | Angiogenin                                               | 0.62                                                             | 0.70         | 0.49          | 0.43 | 0.74                 | 0.61         | 0.51          | 0.62 |
| APLP1     | Amyloid-like protein 1                                   | 2.56                                                             | 6.75         | 6.93          | 3.99 | 4.71                 | 11.0         | 1.91          | 2.17 |
| APOB      | Apolipoprotein B-48                                      | 1.00                                                             | 0.65         | 0.63          | 0.57 | 0.78                 | 0.55         | 0.48          | 0.54 |
| APOM      | Apolipoprotein M                                         | 1.03                                                             | 0.56         | 0.55          | 0.49 | 0.63                 | 0.42         | 0.38          | 0.40 |
| BMP1      | BMP1 protein                                             | 8.55                                                             | 19.7         | 20.8          | 6.74 | 2.96                 | 2.30         | 1.57          | 1.24 |
| C19orf54  | UPF0692 protein C19orf54                                 | 0.65                                                             | 0.43         | 0.45          | 0.42 | 0.55                 | 0.32         | 0.26          | 0.34 |
| C1QA      | Complement C1q subcomponent subunit A                    | 0.72                                                             | 0.48         | 0.47          | 0.42 | 0.71                 | 0.47         | 0.47          | 0.51 |
| C3        | Complement C3                                            | 0.88                                                             | 0.44         | 0.52          | 0.43 | 0.67                 | 0.45         | 0.35          | 0.41 |
| CADM1     | Cell adhesion molecule 1                                 | 1.69                                                             | 3.58         | 4.79          | 4.31 | 2.17                 | 3.01         | 2.29          | 2.34 |
| CAST      | DNA-directed RNA polymerase I subunit RPA34              | 1.24                                                             | 2.44         | 3.78          | 3.27 | 1.24                 | 3.02         | 4.20          | 2.91 |
| CCL14     | C-C motif chemokine 14                                   | 0.70                                                             | 0.55         | 0.55          | 0.41 | 0.79                 | 0.65         | 0.64          | 0.63 |
| CD14      | Monocyte differentiation antigen CD14                    | 0.78                                                             | 0.65         | 0.55          | 0.61 | 0.69                 | 0.61         | 0.48          | 0.56 |
| CD163     | Scavenger receptor cysteine-rich type 1 protein M130     | 0.18                                                             | 0.36         | 0.14          | 0.23 | 0.66                 | 0.49         | 0.50          | 0.48 |
| CDH5      | Cadherin-5                                               | 2.97                                                             | 6.27         | 5.52          | 5.76 | 1.42                 | 2.93         | 2.54          | 2.73 |
| CEP295NL  | Protein LOC100653515                                     | 0.86                                                             | 0.50         | 0.53          | 0.37 | 0.73                 | 0.56         | 0.59          | 0.60 |
| CFL1      | Cofilin-1                                                | 1.08                                                             | 0.52         | 0.53          | 0.54 | 0.67                 | 0.58         | 0.55          | 0.51 |
| CHGA      | Chromogranin A (Parathyroid secretory protein 1)         | 2.13                                                             | 3.66         | 4.35          | 4.38 | 2.11                 | 1.97         | 2.54          | 1.80 |
| CRISP3    | Cysteine-rich secretory protein 3                        | 0.64                                                             | 0.56         | 0.64          | 0.56 | 0.71                 | 0.57         | 0.51          | 0.42 |
| CSF1R     | Macrophage colony-stimulating factor 1 receptor          | 0.72                                                             | 0.57         | 0.56          | 0.59 | 0.53                 | 0.30         | 0.23          | 0.27 |
| CTSD      | Cathepsin D light chain                                  | 1.02                                                             | 0.58         | 0.57          | 0.55 | 0.54                 | 0.32         | 0.27          | 0.28 |
| DKK3      | Dickkopf-related protein 3                               | 3.60                                                             | 5.53         | 5.08          | 3.84 | 2.07                 | 4.02         | 2.18          | 1.90 |
| DSC1      | Desmocollin-1                                            | 0.98                                                             | 0.36         | 0.55          | 0.46 | 0.59                 | 0.38         | 0.44          | 0.46 |
| F11       | Coagulation factor XI                                    | 3.35                                                             | 6.36         | 8.37          | 3.61 | 2.17                 | 2.94         | 3.33          | 2.50 |
| FBLN1     | Fibulin-1                                                | 0.69                                                             | 0.54         | 0.54          | 0.52 | 0.74                 | 0.56         | 0.57          | 0.58 |
| FGFR1     | Fibroblast growth factor receptor 1                      | 5.78                                                             | 7.35         | 7.71          | 12.8 | 3.90                 | 5.25         | 1.98          | 4.30 |
| GAPDH     | Glyceraldehyde-3-phosphate dehydrogenase                 | 0.65                                                             | 0.44         | 0.56          | 0.43 | 0.61                 | 0.49         | 0.38          | 0.40 |
| GHR       | Growth hormone receptor                                  | 1.12                                                             | 2.89         | 2.92          | 6.25 | 2.16                 | 2.29         | 1.89          | 1.99 |
| GLIPR2    | Golgi-associated plant pathogenesis-related protein 1    | 1.23                                                             | 0.58         | 0.57          | 0.60 | 0.67                 | 0.47         | 0.36          | 0.43 |
| GPLD1     | Phosphatidylinositol-glycan-specific phospholipase D     | 0.85                                                             | 0.50         | 0.50          | 0.50 | 0.72                 | 0.64         | 0.55          | 0.57 |

|          |                                                                   |      |      |      |      |      |      |      |      |
|----------|-------------------------------------------------------------------|------|------|------|------|------|------|------|------|
| GSR      | Glutathione reductase_mitochondrial                               | 0.76 | 0.42 | 0.47 | 0.44 | 0.83 | 0.52 | 0.45 | 0.48 |
| HP       | Haptoglobin                                                       | 0.42 | 0.47 | 0.30 | 0.09 | 0.99 | 0.12 | 0.58 | 0.45 |
| HSP90B1  | Endoplasmic                                                       | 0.34 | 0.46 | 1.11 | 0.51 | 0.57 | 0.49 | 0.36 | 0.47 |
| HSPA8    | Heat shock cognate 71 kDa protein                                 | 0.75 | 0.41 | 0.41 | 0.38 | 0.64 | 0.40 | 0.32 | 0.37 |
| IL1RAP   | Interleukin-1 receptor accessory protein                          | 0.77 | 0.66 | 0.62 | 0.51 | 0.60 | 0.39 | 0.32 | 0.34 |
| IL6ST    | Interleukin-6 receptor subunit beta                               | 1.90 | 4.09 | 2.55 | 3.92 | 3.12 | 5.82 | 3.44 | 3.15 |
| ISLR     | Immunoglobulin superfamily containing leucine-rich repeat protein | 0.82 | 0.48 | 0.61 | 0.49 | 0.59 | 0.40 | 0.31 | 0.35 |
| KRT2     | Keratin type II cytoskeletal 2 epidermal                          | 0.78 | 0.43 | 0.55 | 0.44 | 0.69 | 0.47 | 0.54 | 0.51 |
| KRT6B    | Keratin type II cytoskeletal 6B                                   | 0.82 | 0.52 | 0.58 | 0.45 | 0.73 | 0.60 | 0.58 | 0.52 |
| KRT77    | Keratin type II cytoskeletal 1b                                   | 0.73 | 0.51 | 0.60 | 0.60 | 0.77 | 0.49 | 0.57 | 0.56 |
| LAMP2    | Lysosome-associated membrane glycoprotein 2                       | 0.88 | 0.51 | 0.53 | 0.42 | 0.54 | 0.25 | 0.13 | 0.20 |
| LCP1     | Plastin-2                                                         | 0.96 | 0.41 | 0.56 | 0.13 | 0.64 | 0.47 | 0.36 | 0.42 |
| LGALS3BP | Galectin-3-binding protein                                        | 1.04 | 0.55 | 0.56 | 0.49 | 0.57 | 0.38 | 0.29 | 0.32 |
| LTBP1    | Latent-transforming growth factor beta-binding protein 1          | 3.00 | 6.21 | 4.81 | 4.85 | 1.98 | 2.57 | 2.22 | 2.56 |
| LYZ      | Lysozyme C                                                        | 0.81 | 0.50 | 0.53 | 0.50 | 0.59 | 0.38 | 0.29 | 0.35 |
| MINPP1   | Multiple inositol polyphosphate phosphatase                       | 0.39 | 0.20 | 0.48 | 0.77 | 0.51 | 0.21 | 0.13 | 0.18 |
| MYL6     | Myosin light polypeptide 6                                        | 3.74 | 7.18 | 6.82 | 3.94 | 1.49 | 2.02 | 1.84 | 2.46 |
| MYOC     | Myocilin                                                          | 0.87 | 0.48 | 0.55 | 0.43 | 0.49 | 0.25 | 0.11 | 0.14 |
| NTRK2    | BDNF/NT-3 growth factors receptor                                 | 0.68 | 2.20 | 4.79 | 5.15 | 1.03 | 1.69 | 2.49 | 2.38 |
| ORM2     | Alpha-1-acid glycoprotein 2                                       | 3.77 | 3.71 | 2.51 | 2.55 | 2.58 | 2.37 | 1.64 | 1.64 |
| PEPD     | Xaa-Pro dipeptidase                                               | 0.78 | 0.46 | 0.5  | 0.41 | 0.77 | 0.51 | 0.38 | 0.42 |
| PI16     | Peptidase inhibitor 16                                            | 0.80 | 0.56 | 0.62 | 0.57 | 0.61 | 0.35 | 0.35 | 0.42 |
| PKM      | Pyruvate kinase                                                   | 0.31 | 0.42 | 0.52 | 0.28 | 0.73 | 0.50 | 0.45 | 0.47 |
| PLS3     | Plastin-3                                                         | 3.02 | 5.65 | 3.34 | 4.17 | 8.15 | 8.74 | 5.58 | 4.34 |
| PON1     | Serum paraoxonase/arylesterase 1                                  | 0.62 | 0.47 | 0.50 | 0.45 | 0.74 | 0.61 | 0.50 | 0.57 |
| POTEF    | POTE ankyrin domain family member F                               | 0.71 | 0.51 | 0.48 | 0.66 | 0.72 | 0.49 | 0.40 | 0.54 |
| PPIA     | Peptidyl-prolyl cis-trans isomerase A                             | 0.64 | 0.45 | 0.59 | 0.52 | 0.61 | 0.42 | 0.40 | 0.46 |
| RAD18    | E3 ubiquitin-protein ligase RAD18                                 | 3.07 | 2.48 | 1.96 | 2.30 | 3.19 | 5.60 | 2.43 | 2.25 |
| SERPINA6 | Corticosteroid-binding globulin                                   | 3.28 | 5.99 | 4.38 | 6.03 | 3.05 | 1.73 | 2.47 | 2.01 |
| SLURP1   | Secreted Ly-6/uPAR-related protein 1                              | 0.94 | 0.58 | 0.59 | 0.38 | 0.58 | 0.39 | 0.35 | 0.43 |
| SYBU     | Syntabulin                                                        | 0.66 | 0.51 | 0.66 | 0.45 | 0.58 | 0.40 | 0.41 | 0.46 |
| TPI1     | Triosephosphate isomerase                                         | 0.98 | 0.53 | 0.53 | 0.46 | 0.70 | 0.49 | 0.48 | 0.48 |
| TTR      | Transthyretin                                                     | 2.15 | 2.34 | 2.64 | 2.51 | 3.53 | 4.82 | 3.23 | 1.80 |
| TUBA1C   | Tubulin alpha-1C chain                                            | 0.68 | 0.52 | 0.63 | 0.39 | 0.57 | 0.34 | 0.28 | 0.36 |
| VNN1     | Pantetheinase                                                     | 3.22 | 5.86 | 4.82 | 5.14 | 1.60 | 1.69 | 1.45 | 1.53 |
| VTN      | Homeobox protein SEBOX                                            | 0.69 | 0.53 | 0.66 | 0.53 | 0.59 | 0.41 | 0.31 | 0.36 |
| ZBED3    | Zinc finger BED domain-containing protein 3                       | 0.59 | 0.56 | 0.84 | 0.66 | 0.57 | 0.36 | 0.33 | 0.36 |

\*Ratios from the Loess normalization.

**Table S3. Proteins potentially relevant to fibrotic mechanisms in chronic GVHD**

| <b>Protein</b> | <b>Relevant biology</b>                                                                                                                    | <b>Luminex availability</b> |
|----------------|--------------------------------------------------------------------------------------------------------------------------------------------|-----------------------------|
| BMP1           | Keloid formation <sup>1</sup>                                                                                                              | No                          |
| CAST           | Skin wound healing and scar formation <sup>2,3</sup>                                                                                       | No                          |
| CCL14          | M2 macrophage biology, <sup>4</sup> regulation of adhesion molecules and extracellular matrix <sup>5</sup>                                 | <b>Yes</b>                  |
| DKK3           | Kidney fibrosis, <sup>6</sup> cardiac fibrosis, <sup>7</sup> human keloid, <sup>8</sup> modulator of B cell fate and function <sup>9</sup> | <b>Yes</b>                  |
| FGFR1          | Pulmonary fibrosis, <sup>10-12</sup> renal fibrosis <sup>13</sup>                                                                          | No                          |
| IL1RAP         | Inhibitor of interleukin-1 in collagen-induced arthritis <sup>14,15</sup>                                                                  | <b>Yes</b>                  |
| IL6ST          | Fibrosis in the skin, <sup>16</sup> liver <sup>17</sup> and lung <sup>18</sup>                                                             | <b>Yes</b>                  |
| LAMP2          | Immune activation in systemic sclerosis <sup>19</sup>                                                                                      | No                          |
| LGALS3BP       | Liver fibrosis, <sup>20</sup> monocyte-derived fibrocyte differentiation <sup>21</sup>                                                     | <b>Yes</b>                  |
| LTBP1          | Fibrogenesis <sup>22,23</sup>                                                                                                              | No                          |

**Table S4. Linear regression analysis of DKK3 concentrations in patients with chronic GVHD**

**(A) Single regression model**

| <b>Factor</b>                                             | <b>N</b> | <b>Fold difference* (95% CI)</b> | <b>P</b> |
|-----------------------------------------------------------|----------|----------------------------------|----------|
| <b>Cohort</b>                                             |          |                                  |          |
| Discovery                                                 | 54       | 1.00 (reference)                 |          |
| Verification                                              | 124      | 0.77 (0.67-0.87)                 | <0.001   |
| <b>Duration from HCT to sample draw per year</b>          | 178      | 0.93 (0.88-0.98)                 | 0.005    |
| <b>Duration from chronic GVHD to sample draw per year</b> | 178      | 0.93 (0.88-0.98)                 | 0.008    |

\*Fold difference values represent the anti-log<sub>10</sub> of the regression coefficient.

**(B) Multiple regression model**

| <b>Factor</b>                                             | <b>N</b> | <b>Fold difference* (95% CI)</b> | <b>P</b> |
|-----------------------------------------------------------|----------|----------------------------------|----------|
| <b>Model 1</b>                                            |          |                                  |          |
| <b>Cohort</b>                                             |          |                                  |          |
| Discovery                                                 | 54       | 1.00 (reference)                 |          |
| Verification                                              | 124      | 0.78 (0.66-0.92)                 | 0.003    |
| <b>Duration from HCT to sample draw per year</b>          | 178      | 0.99 (0.92-1.06)                 | 0.74     |
| <b>Model 2</b>                                            |          |                                  |          |
| <b>Cohort</b>                                             |          |                                  |          |
| Discovery                                                 | 54       | 1.00 (reference)                 |          |
| Verification                                              | 124      | 0.79 (0.68-0.91)                 | 0.001    |
| <b>Duration from chronic GVHD to sample draw per year</b> | 178      | 0.98 (0.92-1.04)                 | 0.46     |

\*Fold difference values represent the anti-log<sub>10</sub> of the regression coefficient.

**Table S5. Comparison of GVHD severity and sites between the cohorts**

| <b>Characteristic, no (%)</b> | <b>Discovery</b> | <b>Verification</b> | <b><i>P</i></b> |
|-------------------------------|------------------|---------------------|-----------------|
| <b>NIH global severity</b>    |                  |                     | <0.001          |
| Mild                          | 4 (7)            | 39 (31)             |                 |
| Moderate                      | 35 (65)          | 35 (28)             |                 |
| Severe                        | 15 (15)          | 50 (40)             |                 |
| <b>Involved sites</b>         |                  |                     |                 |
| Skin                          | 38 (70)          | 74 (60)             | 0.18            |
| Mouth                         | 39 (72)          | 58 (47)             | 0.002           |
| Eye                           | 29 (54)          | 72 (58)             | 0.62            |
| Gastrointestinal tract        | 18 (33)          | 24 (19)             | 0.055           |
| Liver                         | 7 (13)           | 5 (4)               | 0.047           |
| Lung (BOS)                    | 6 (11)           | 4 (3)               | 0.069           |
| Joint/fascia                  | 16 (30)          | 57 (46)             | 0.048           |
| Genital                       | 6 (11)           | 15 (12)             | 1.0             |

**Table S6. Linear regression analysis of DKK3 concentrations in patients with chronic GVHD**

| Factor                     | N   | Single regression: Unadjusted |        | Multiple regression: Adjusted |       |
|----------------------------|-----|-------------------------------|--------|-------------------------------|-------|
|                            |     | Fold difference* (95% CI)     | P      | Fold difference* (95% CI)     | P     |
| <b>Cohort</b>              |     |                               |        |                               |       |
| Discovery                  | 54  | 1.00 (reference)              |        | 1.00 (reference)              |       |
| Verification               | 124 | 0.77 (0.67-0.87)              | <0.001 | 0.77 (0.67-0.89)              | 0.001 |
| <b>NIH global severity</b> |     |                               |        |                               |       |
| Mild                       | 43  | 1.00 (reference)              |        | 1.00 (reference)              |       |
| Moderate                   | 70  | 1.26 (1.08-1.47)              | 0.004  | 1.15 (0.93-1.41)              | 0.20  |
| Severe                     | 65  | 1.20 (1.03-1.40)              | 0.023  | 1.19 (0.95-1.48)              | 0.13  |
| <b>Involved sites</b>      |     |                               |        |                               |       |
| Skin                       | 112 | 1.06 (0.93-1.20)              | 0.39   | 0.91 (0.77-1.07)              | 0.23  |
| Mouth                      | 97  | 1.10 (0.97-1.24)              | 0.12   | 1.02 (0.90-1.16)              | 0.77  |
| Eye                        | 101 | 1.10 (0.98-1.25)              | 0.11   | 1.09 (0.96-1.24)              | 0.17  |
| Gastrointestinal tract     | 42  | 1.07 (0.93-1.24)              | 0.32   | 1.00 (0.87-1.16)              | 0.95  |
| Liver                      | 12  | 1.06 (0.83-1.36)              | 0.62   | 0.99 (0.78-1.27)              | 0.95  |
| Lung (BOS)                 | 10  | 1.04 (0.80-1.36)              | 0.76   | 0.97 (0.74-1.27)              | 0.82  |
| Joint/fascia               | 73  | 1.05 (0.93-1.18)              | 0.47   | 1.05 (0.90-1.23)              | 0.53  |
| Genital                    | 21  | 0.93 (0.77-1.13)              | 0.47   | 0.89 (0.73-1.07)              | 0.21  |

\*Fold difference values represent the anti-log<sub>10</sub> of the regression coefficient.

**Table S7. Sensitivity, specificity, PPV, and NPV associated with chronic GVHD in the verification cohort**

| <b>Event</b>                           | <b>Threshold, Log<sub>10</sub> pg/ml</b> | <b># above threshold</b> | <b>Sensitivity</b> | <b>Specificity</b> | <b>PPV</b> | <b>NPV</b> |
|----------------------------------------|------------------------------------------|--------------------------|--------------------|--------------------|------------|------------|
| <b>Chronic GVHD overall</b>            | 4.5                                      | 181                      | 0.99               | 0.06               | 0.68       | 0.80       |
|                                        | 4.6                                      | 162                      | 0.96               | 0.31               | 0.73       | 0.79       |
|                                        | 4.7                                      | 136                      | 0.88               | 0.56               | 0.80       | 0.70       |
|                                        | 4.8                                      | 101                      | 0.71               | 0.81               | 0.88       | 0.59       |
|                                        | 4.9                                      | 71                       | 0.55               | 0.95               | 0.96       | 0.51       |
|                                        | 5.0                                      | 42                       | 0.34               | 1.00               | 1.00       | 0.43       |
|                                        | 5.1                                      | 14                       | 0.11               | 1.00               | 1.00       | 0.36       |
|                                        | 5.2                                      | 6                        | 0.05               | 1.00               | 1.00       | 0.64       |
| <b>Moderate to severe chronic GVHD</b> | 4.5                                      | 181                      | 0.99               | 0.04               | 0.46       | 0.80       |
|                                        | 4.6                                      | 162                      | 0.95               | 0.20               | 0.50       | 0.83       |
|                                        | 4.7                                      | 136                      | 0.89               | 0.41               | 0.56       | 0.82       |
|                                        | 4.8                                      | 101                      | 0.79               | 0.66               | 0.66       | 0.79       |
|                                        | 4.9                                      | 71                       | 0.62               | 0.82               | 0.75       | 0.72       |
|                                        | 5.0                                      | 42                       | 0.38               | 0.90               | 0.76       | 0.63       |
|                                        | 5.1                                      | 14                       | 0.13               | 0.97               | 0.79       | 0.57       |
|                                        | 5.2                                      | 6                        | 0.05               | 0.98               | 0.67       | 0.55       |

PPV, positive predictive value; NPV, negative predictive value.



**Table S8. Linear single regression analysis of patient age for DKK3 concentrations in the verification cohort**

| <b>Factor</b>                                                                   | <b>N</b> | <b>Fold difference* (95% CI)</b> | <b>P</b> |
|---------------------------------------------------------------------------------|----------|----------------------------------|----------|
| Patient age at sample in patients without chronic GVHD, continuous (per decade) | 62       | 1.06 (0.99-1.12)                 | 0.078    |
| Patient age at sample in patients with chronic GVHD, continuous (per decade)    | 124      | 1.08 (1.02-1.14)                 | 0.005    |

\*Fold difference values represent the anti-log<sub>10</sub> of the regression coefficient.

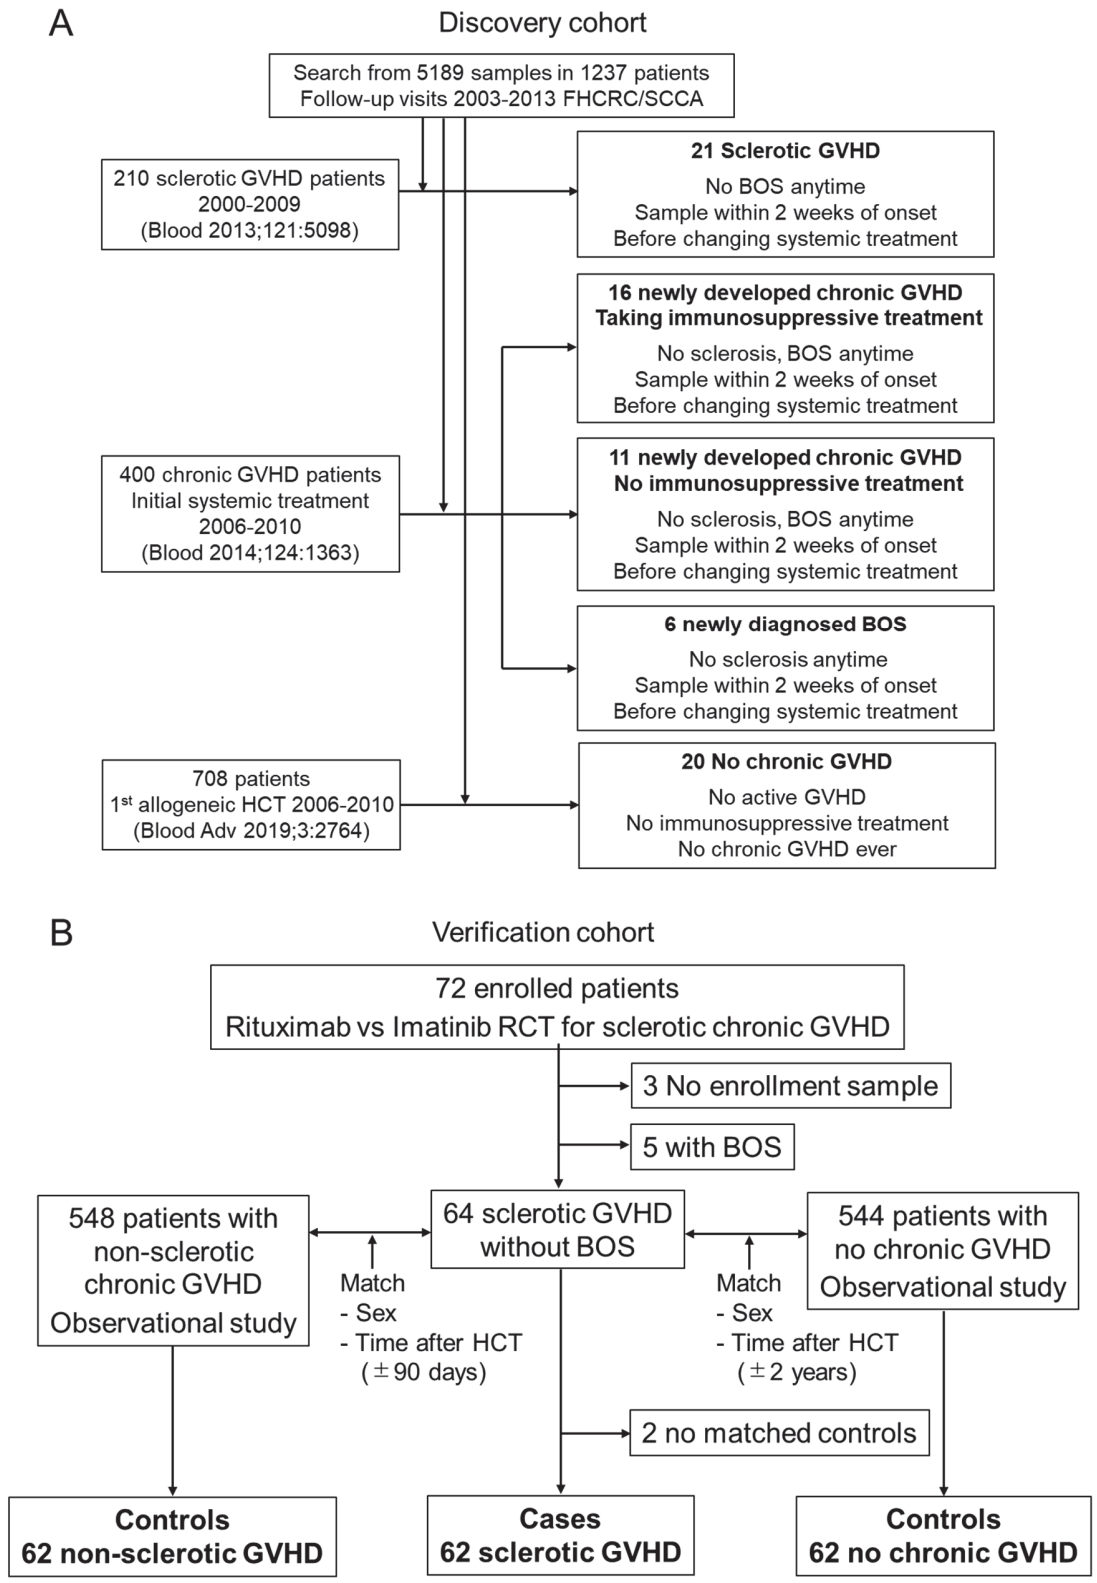

Figure S1. CONSORT diagram for (A) discovery cohort and (B) verification cohort.

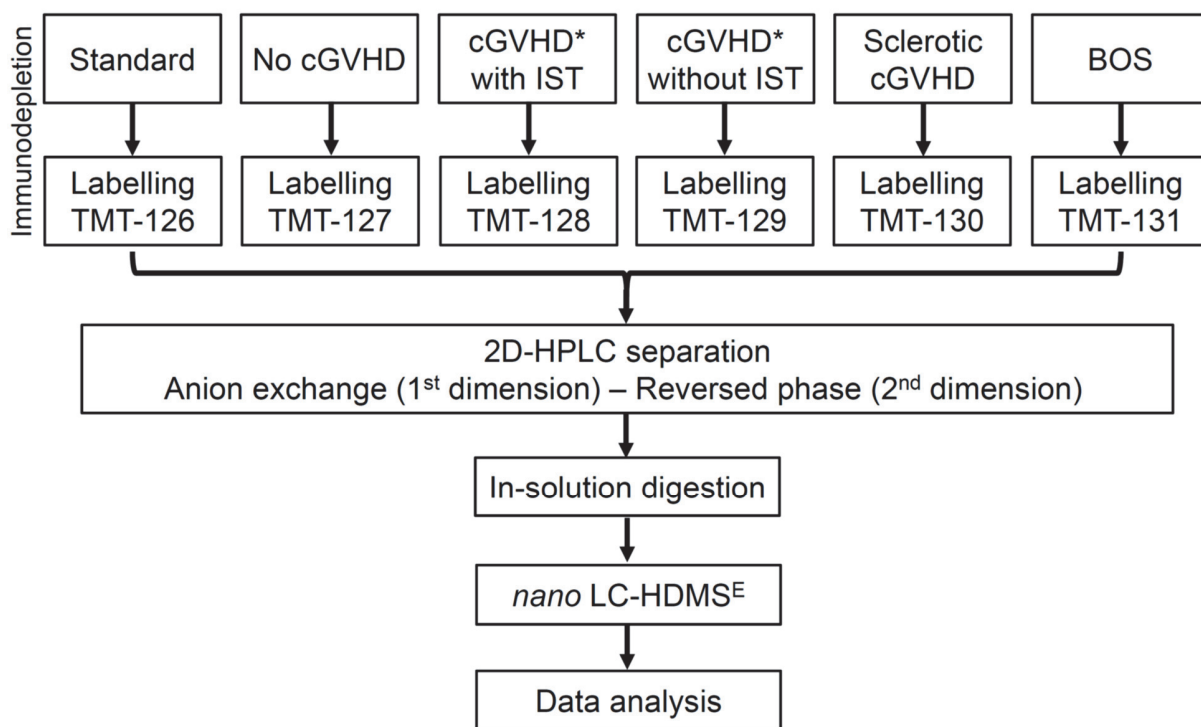

**Figure S2. Quantitative plasma proteomics platform of multiplex mass spectrometry.**

\*Chronic GVHD other than sclerotic chronic GVHD or bronchiolitis obliterans. chronic GVHD, chronic GVHD; IST, immunosuppressive treatment; BOS, bronchiolitis obliterans syndrome; TMT, tandem mass tag; 2D-HPLC, two-dimensional high-performance liquid chromatography; LC-HDMS, liquid chromatography coupled with high-definition mass spectrometry.

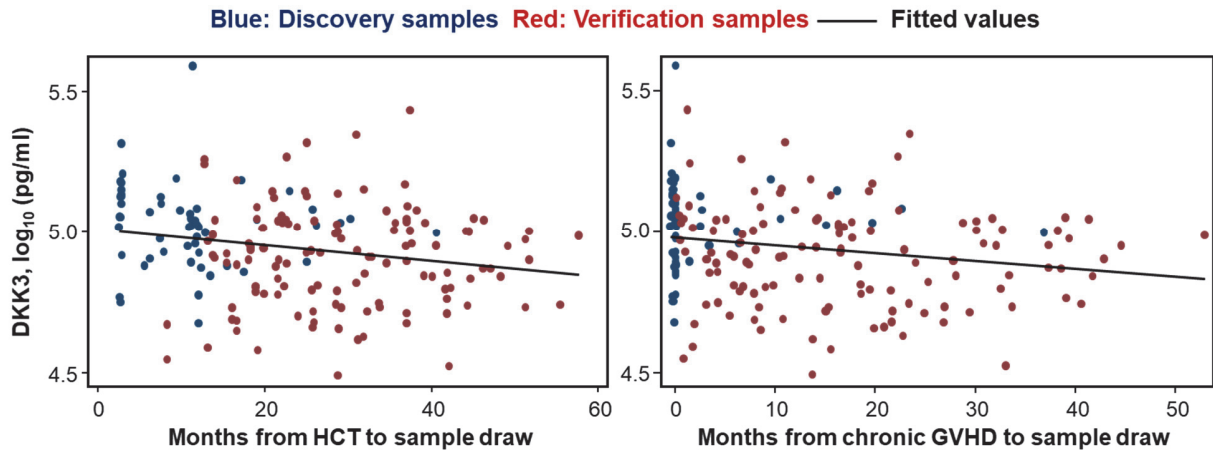

**Figure S3. DKK3 concentrations according to time to sample draw.** Blue dots represent values in discovery samples, and red dots represent values in verification samples. The black line indicates fitted values.

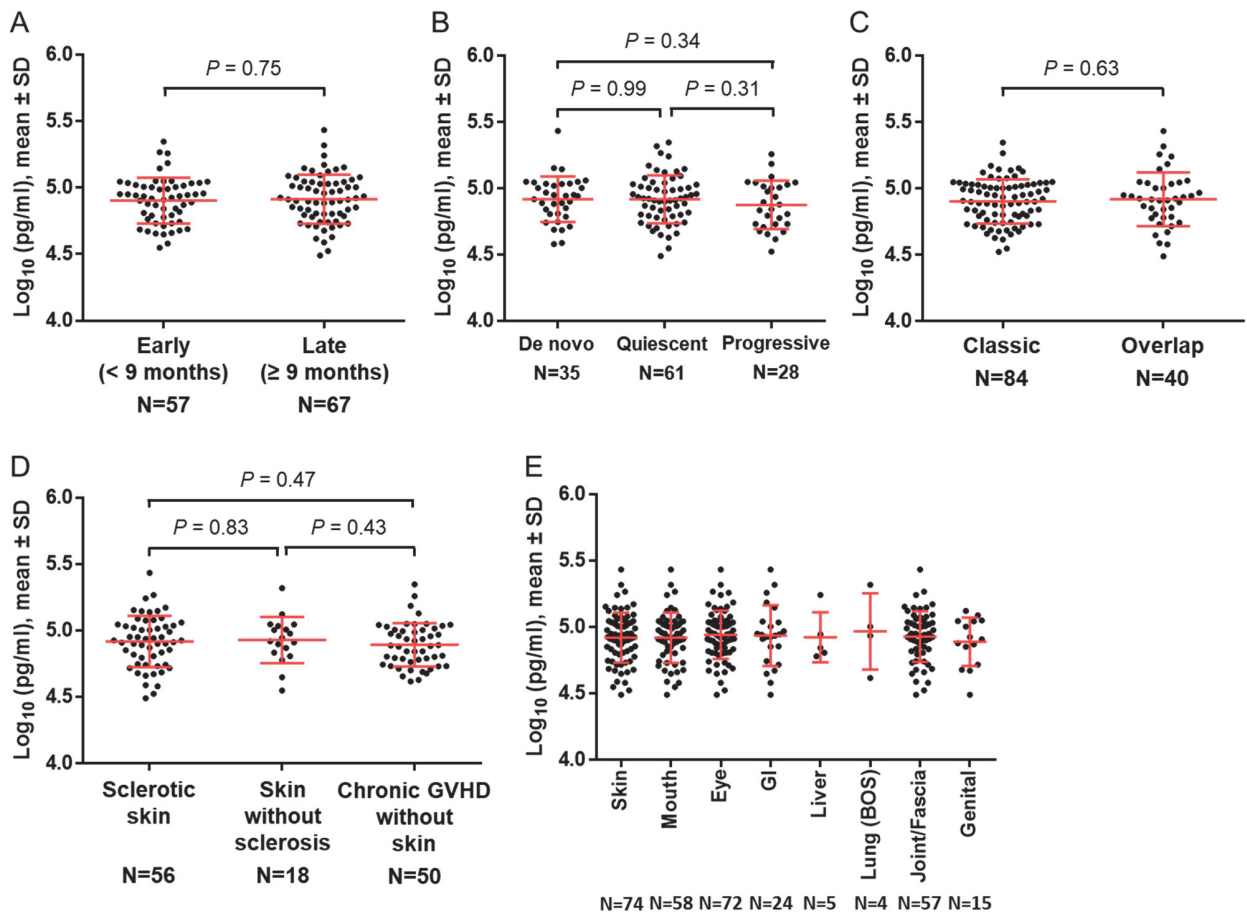

**Figure S4. DKK3 concentrations according to (A) early (<9 months) vs late onset (≥9 months) chronic GVHD, (B) onset type, (C) chronic GVHD subcategory, (D) skin features, and (E) involved sites in the verification cohort.**

## References:

1. Fuentes-Duculan J, Bonifacio KM, Suarez-Farinas M, et al. Aberrant connective tissue differentiation towards cartilage and bone underlies human keloids in African Americans. *Exp Dermatol*. 2017;26(8):721-727.
2. Nassar D, Letavernier E, Baud L, Aractingi S, Khosrotehrani K. Calpain activity is essential in skin wound healing and contributes to scar formation. *PLoS One*. 2012;7(5):e37084.
3. Lin Z, Zhao J, Nitou D, et al. Loss-of-function mutations in CAST cause peeling skin, leukonychia, acral punctate keratoses, cheilitis, and knuckle pads. *Am J Hum Genet*. 2015;96(3):440-447.
4. Jaguin M, Houlbert N, Fardel O, Lecreur V. Polarization profiles of human M-CSF-generated macrophages and comparison of M1-markers in classically activated macrophages from GM-CSF and M-CSF origin. *Cell Immunol*. 2013;281(1):51-61.
5. Hannan NJ, Salamonsen LA. CX3CL1 and CCL14 regulate extracellular matrix and adhesion molecules in the trophoblast: potential roles in human embryo implantation. *Biol Reprod*. 2008;79(1):58-65.
6. Federico G, Meister M, Mathow D, et al. Tubular Dickkopf-3 promotes the development of renal atrophy and fibrosis. *JCI Insight*. 2016;1(1):e84916.
7. Zhai CG, Xu YY, Tie YY, et al. DKK3 overexpression attenuates cardiac hypertrophy and fibrosis in an angiotensin-perfused animal model by regulating the ADAM17/ACE2 and GSK-3beta/beta-catenin pathways. *J Mol Cell Cardiol*. 2018;114:243-252.
8. Li Y, Liu H, Liang Y, Peng P, Ma X, Zhang X. DKK3 regulates cell proliferation, apoptosis and collagen synthesis in keloid fibroblasts via TGF-beta1/Smad signaling pathway. *Biomed Pharmacother*. 2017;91:174-180.
9. Ludwig J, Federico G, Prokosch S, et al. Dickkopf-3 acts as a modulator of B cell fate and function. *J Immunol*. 2015;194(6):2624-2634.
10. Shimbori C, Bellaye PS, Xia J, et al. Fibroblast growth factor-1 attenuates TGF-beta1-induced lung fibrosis. *J Pathol*. 2016;240(2):197-210.
11. Guzy RD, Li L, Smith C, et al. Pulmonary fibrosis requires cell-autonomous mesenchymal fibroblast growth factor (FGF) signaling. *J Biol Chem*. 2017;292(25):10364-10378.
12. MacKenzie B, Korfei M, Henneke I, et al. Increased FGF1-FGFRc expression in idiopathic pulmonary fibrosis. *Respir Res*. 2015;16:83.
13. Liu F, Wang L, Qi H, et al. Nintedanib, a triple tyrosine kinase inhibitor, attenuates renal fibrosis in chronic kidney disease. *Clin Sci (Lond)*. 2017;131(16):2125-2143.
14. Smeets RL, van de Loo FA, Joosten LA, et al. Effectiveness of the soluble form of the interleukin-1 receptor accessory protein as an inhibitor of interleukin-1 in collagen-induced arthritis. *Arthritis Rheum*. 2003;48(10):2949-2958.

15. Smeets RL, Joosten LA, Arntz OJ, et al. Soluble interleukin-1 receptor accessory protein ameliorates collagen-induced arthritis by a different mode of action from that of interleukin-1 receptor antagonist. *Arthritis Rheum*. 2005;52(7):2202-2211.
16. Hasegawa M, Sato S, Fujimoto M, Ihn H, Kikuchi K, Takehara K. Serum levels of interleukin 6 (IL-6), oncostatin M, soluble IL-6 receptor, and soluble gp130 in patients with systemic sclerosis. *J Rheumatol*. 1998;25(2):308-313.
17. Streetz KL, Tacke F, Leifeld L, et al. Interleukin 6/gp130-dependent pathways are protective during chronic liver diseases. *Hepatology*. 2003;38(1):218-229.
18. Moodley YP, Scaffidi AK, Misso NL, et al. Fibroblasts isolated from normal lungs and those with idiopathic pulmonary fibrosis differ in interleukin-6/gp130-mediated cell signaling and proliferation. *Am J Pathol*. 2003;163(1):345-354.
19. Holcombe RF, Baethge BA, Stewart RM, et al. Cell surface expression of lysosome-associated membrane proteins (LAMPs) in scleroderma: relationship of lamp2 to disease duration, anti-Sc170 antibodies, serum interleukin-8, and soluble interleukin-2 receptor levels. *Clin Immunol Immunopathol*. 1993;67(1):31-39.
20. Cheung KJ, Libbrecht L, Tilleman K, Deforce D, Colle I, Van Vlierberghe H. Galectin-3-binding protein: a serological and histological assessment in accordance with hepatitis C-related liver fibrosis. *Eur J Gastroenterol Hepatol*. 2010;22(9):1066-1073.
21. White MJ, Roife D, Gomer RH. Galectin-3 Binding Protein Secreted by Breast Cancer Cells Inhibits Monocyte-Derived Fibrocyte Differentiation. *J Immunol*. 2015;195(4):1858-1867.
22. Kim HS, Yoon YM, Meang MK, et al. Reversion of in vivo fibrogenesis by novel chromone scaffolds. *EBioMedicine*. 2019;39:484-496.
23. Caja L, Dituri F, Mancarella S, et al. TGF-beta and the Tissue Microenvironment: Relevance in Fibrosis and Cancer. *Int J Mol Sci*. 2018;19(5).
